## Sound production mechanism in *Pomatoschistus pictus*

Parmentier Eric<sup>1</sup>, Petrinisec Maud<sup>1</sup>, Fonseca Paulo J<sup>2</sup>., Amorim, M. Clara P<sup>3</sup>.

<sup>1</sup>Université de Liège, Laboratoire de Morphologie Fonctionnelle et Evolutive, AFFISH-RC, Institut de Chimie - B6C, Sart Tilman, 4000 Liège, Belgium

<sup>2</sup>Departamento de Biologia Animal and cE3c - Centre for Ecology, Evolution and Environmental Changes, Faculdade de Ciências, Universidade de Lisboa, Lisbon, Portugal

<sup>3</sup>MARE - Marine and Environmental Sciences Centre, ISPA - Instituto Universitário, Lisbon, Portugal

### Summary statement

Our study further tests the sound producing mechanism in Gobionellinae. As in Gobiinae, it is related to head-pectoral movements. It shows the consistency of mechanism in Gobiidae.

### Abstract

Fish acoustic signals play a major role during agonistic and reproductive interactions. Among the sound-generating fish, Gobiidae, a large fish taxa with 1866 valid species, is one of the most studied groups of acoustic fishes with sound production being documented in a number of species. Paradoxically, the sound producing mechanism remains poorly studied in this group. The painted goby *Pomatoschistus pictus* produces two distinct sounds called drums and thumps. A combination of morphological and experimental analyses involving high-speed videos synchronized with sound recordings supports that drums are produced during lateral head movements involving at least the alternate contractions of the muscles *levator pectoralis* originating on the skull and inserting on the pectoral girdle. These movements are reported in many Gobiidae species suggesting the pectoral-girdle based mechanism is common in the clade and could have evolved from locomotory movements.

## Introduction

Sound production in Gobiidae is documented in 23 species (Horvatić et al., 2016; Lugli and Torricelli, 1999; Lugli et al., 1996; Malavasi et al., 2008) belonging to 10 different genera. Different kinds of calls have been described. 1) Pulsed sounds or drums consisting of pulse trains repeated at a slow to fast rate (around 5–100 pulses/s), which can be amplitude modulated (Bass and McKibben, 2003; Malavasi et al., 2008; Zeyl et al., 2016). 2) Tonal sounds showing a sinusoidal-like waveform with no inter-pulse intervals (Bass and McKibben, 2003; Malavasi et al., 2008). 3) Complex sounds involving a combination of both aforementioned sounds (Bass and McKibben, 2003). 4) Thumps, that are short (74–89 ms) non-pulsed sounds of very low frequency (below 100 Hz) and with sound energy under 1 kHz (Amorim and Neves, 2007). Tonal, pulsatile and complex sounds exemplify the continuum from trains of pulsed sounds to tonal sounds (Lugli et al., 1995; Zeyl et al., 2016) and can be considered as members of the same sound category or group (G1). Thumps are non-pulsed sounds and form a second group (G2).

Different sound-production mechanisms have been proposed in gobies: , muscles acting on the swimbladder (Lugli et al., 1995), hydrodynamic mechanisms with ejection of water through the gill openings (Stadler, 2002), contraction of muscles inserting on the pectoral girdles (Lugli et al., 1996). Only the latter hypothesis has been experimentally tested in *Gobius paganellus* whose sounds are clearly related to movements of the pectoral girdle due to contractions of the *levator pectoralis* muscles (Parmentier et al., 2013). This muscle exhibits many characteristics found in specialized sonic muscles: ribbon-like myofibrils structure, well-developed sarcoplasmic reticulum tubules, a mitochondria dense core and numerous peripheral mitochondria (Parmentier et al., 2013). Additional studies on sound-production mechanisms are however required to seek a common mechanism within the family.

Atlantic-Mediterranean gobies can be subdivided into the gobiine-like gobiids, including e.g. *Gobius*, *Padogobius*, and gobionelline-like gobiids, comprising e.g. *Pomatoschistus*, *Knipowitschia* (Agorreta et al., 2013; Horvatić et al., 2016). Both taxa show a clear distinction in sounds, suggesting a correlation between acoustic structures and phylogenetic relationships. Tonal, pulsatile and complex sounds from G1 were reported within Gobiinae (Malavasi et al., 2008) but only pulsatile calls from this

group were described within Gobionellinae (Amorim et al., 2013). Thumps (G2) were currently only described in the Gobionellinae *Pomatoschistus pictus* and *P. cansetrinii* (Amorim and Neves, 2007; Malavasi et al., 2009).

Painted goby *Pomatoschistus pictus* produce two types of calls (Vicente et al., 2015). Drums (in G1) and thumps (in G2) are made to attract and court females but only drums are used during agonistic interactions (Amorim and Neves, 2007; Amorim and Neves, 2008; Bolgan et al., 2013). Simultaneously with drum emission, males erect the pelvic fins elevating the body and exhibit lateral and frontal displays, extending the fins, darkening the chin and quivering the body (Amorim and Neves, 2007).

The description of the sound producing mechanism in *Pomatoschistus pictus* and its comparison with *Gobius paganellus* should highlight whether the sonic mechanism is the same in these two species belonging to distinct phylogenetic groups.

## Material and Methods

All experimental procedures followed a protocol that was approved by the local ethics committee of the University of Liège (#1226). *Pomatoschistus pictus* is not an endangered or protected species and specimens were not caught in protected areas.

Fish were collected in February and March 2016 at Parede (38°41'N, 9°21'W) and Arrábida (38°26'N, 9°06'W) in Portugal. Fish were maintained in tanks (32 × 25 × 25 cm) having sand substrate and shelters. The artificial filtered sea water was kept at c. 16°C, fish were fed daily with shrimps and mussels and natural photoperiod was 12L : 12D.

Experiments were conducted in 35 L tanks set on vibration-absorbing material. Following Amorim and colleagues (Amorim et al., 2013), a male was placed in the tank provided with a PVC shelter and females were then added in the tank.

Seventeen video recordings (26 frames s<sup>-1</sup>) from 17 males were obtained with a video camera (Sony DCR-SR15) synchronized with the Bruel & Kjaer 8104 hydrophone positioned in the nest chimney. In addition, lateral and dorsal views were filmed with a Redlake MotionPro high-speed camera (500 frames s<sup>-1</sup>) also coupled with the Bruel & Kjaer 8104 hydrophone. The male was

illuminated with a Led torch situated ca. 1 m behind the camera. On the basis of four fish, four lateral and one dorsal views allowed the detailed description of movements during drums.

Ten males were then euthanized with an excess of MS222 (tricaine methane sulphonate; Pharmaq, Norway) and conserved in ethanol (70%). Two of them were alizarin stained (Taylor and Van Dyke 1985) and the others were dissected to identify the muscles involved in the sound-production mechanism.

Sounds of 17 males ( $4.28 \pm 0.25$  cm TL) were analysed with Raven 1.5 for Windows (Bioacoustics Research Program, Cornell Laboratory of Ornithology, Ithaca, NY, USA). The acoustic pulse is considered the fundamental unit of the drum sound (Lindström and Lugli, 2000). Drums were analysed for sound duration (ms), total number of pulses in a drum sound and pulse period (ms).

## Results and discussion

The mechanism dealing with sound production in gobiids was originally experimentally studied in *Gobius paganellus* (Parmentier et al., 2013). In this fish, it appears that pectoral girdles are involved because 1) electromyography revealed the contraction of the *levator pectoralis* during the sound production and 2) these shoulder girdle muscles possess characteristics of high speed muscles usually found in calling fishes (Parmentier and Fine, 2016). Electromyography was not used in the framework of this study because of the small size of the fish. However, dissections revealed the strong similarities between the musculo-skeletal system of *G. paganellus* and *P. pictus*. A complete description of head skeleton and muscles is provided for *Pomatoschistus lozaoni* (Adriaens et al., 1993) and is similar to *P. pictus* (Fig. 1). The relevant parts of the pectoral girdle are the post-temporal, the supracleithrum and the cleithrum. Coracoid and scapulae are associated with the cleithrum. The post-temporal consists of a basal plate with two rostrally directed processes that form a fork with a dorsal and a lateral attachment to the skull. The rostral tip of the dorsal process is flattened and is firmly connected to the epiotic bone whereas the ventral process extends rostrally into a ligament that is attached to the neurocranium. The supracleithrum articulates with the post-temporal and the cleithrum. The *levator pectoralis* muscle is divided into two bundles: *pars lateralis* and *pars medialis*. The *pars lateralis* originates on the caudal margin of the pterotic bone from the neurocranium and is attached to the rostral margin of the cleithral

bone. The *pars medialis* originates on the exoccipital bone and is inserted on the medial side of the supracleithrum.

High speed videos clearly show a strong relationship between lateral head movements and the production of pulses. Movements observed during drum production concerned mainly the mouth, the opercles, the lateral head and body movements, and the back and forth sweeping of pectoral fins. However, only pectoral fins and lateral movements were correlated with drum pulses. A complete cycle of lateral head movements was related to the production of 4 pulses (Fig. 2). The first pulse occurred when the head was on the left side. The second pulse took place when the head was in the axis of the fish body. No pulse was detected when the head was on the right side. The third pulse was produced when the head came back in the body axis and the fourth pulse was produced at the end of the cycle, meaning when the head was again on the left. The total cycle was performed in around 84 ms at 200 frames s<sup>-1</sup>. Pulse period was  $23 \pm 4$  ms (n = 210), a cycle corresponding to four pulses. The mean number of pulses of  $21 \pm 9$  (n= 211) corresponded to *ca* 4 - 6 complete head cycles during drum production. The lateral head movements were probably amplified by the sweepings of pectoral fins: posterior displacement of the right fin helped to turn left and inversely. These lateral displacements of the head were also exhibited when there was no call but they were slower in this case.

In Gobiinae *G. paganellus* (Parmentier et al., 2013), nodding was associated with drum production whereas lateral head movements were observed in Gobionellinae *P. pictus*. Although movements are different in both species, kinematic analysis indicated a relationship between the head movement and the pulse construction. These head movements are observed during the production of drums in many other gobiid and cottid species (Colleye et al., 2013; Lugli et al., 1997; Polgar et al., 2011; Zeyl et al., 2016). Although they are related to sound production, they could however be mainly a visual display that reinforce the acoustic signal.

In addition to the common ability to produce drums, *Gobius paganellus* and *P. pictus* share many similar characteristics: pectoral girdle, *levator pectoralis*, head movements during the calls. Moreover, these characteristics are also found in Cottidae (Barber and Mowbray, 1956; Bass and Baker, 1991).

We thus suggest the pectoral girdle is involved in drum production in *P. pictus* and that the mechanism is actuated by the contractions of the *levator pectoralis*. As *Gobius paganellus* and *P. pictus* are found in the two sister clades (Gobiinae and Gobionellinae) within the Gobiidae, the mechanism should be common to the family. It remains however to be determined how the sound is radiated. The pectoral girdle could be the sound transducer (Barber and Mowbray, 1956; Whang and Janssen, 1994) or their vibrating movements could be amplified by the radials at the level of the fins (Parmentier et al., 2013). Lateral movements of the head (and in less extent of the body) suggest hydrodynamic based sounds. However, strong similarities between mudskipper vocalisations that are produced out of water and underwater sounds of other gobies (Polgar et al., 2011) do not support this hypothesis. Moreover, the movements would probably need to occur much faster to be able to generate the short drum pulses.

Gobiidae do not show obvious sonic mechanical structures but have the classical Bauplan of Perciformes (Lugli et al., 1997; Malavasi et al., 2008; Stadler, 2002). In different taxa, sound production results from the independent modification of existing structures having originally other functions (Parmentier et al., 2017). We suggest that in Gobiidae sounds could have evolved from locomotory movements related to the pectoral girdle.

### **Competing interest**

The authors declare no competing or financial interests

### **Author contribution**

E.P. and C.A. designed the study; M.P., C.A., P.F. and E.P. carried out the experiments; M.P., C.A. and P.F. performed high-speed camera experiments and sound recordings; E.P. made the morphological study; M.P. and E.P. analyzed the data. All authors wrote the manuscript and gave final approval for publication.

### **Funding**

The Science and Technology Foundation, Portugal funded M.C.P.A. [strategic projects UID/MAR/04292/2013 granted to MARE) and P.J.F. (UID/BIA/00329/2013 granted to cE3c). This research was also funded by a grant from the Fonds National de la Recherche Scientifique - FNRS [T.0056.13 and T.0101.15 to E.P.]

- Adriaens, D., Decleyre, D. and Verraes, W.** (1993). Morphology of the pectoral girdle in *Pomatoschistus lozanoi* De Buen, 1923 (Gobiidae), in relation to pectoral fin adduction. *Belgian J. Zool.* **123**, 137–157.
- Agorreta, A., San Mauro, D., Schliewen, U., Van Tassell, J. L., Kovačić, M., Zardoya, R. and Rüber, L.** (2013). Molecular phylogenetics of Gobioidae and phylogenetic placement of European gobies. *Mol. Phylogenet. Evol.* **69**, 619–633.
- Amorim, M. C. P. and Neves, A. S. M.** (2007). Acoustic signalling during courtship in the painted goby, *Pomatoschistus pictus*. *J. Mar. Biol. Assoc. UK* **87**, 1017.
- Amorim and Neves** (2008). Male painted gobies (*Pomatoschistus pictus*) vocalise to defend territories. *Behaviour* **145**, 1065–1083.
- Amorim, M. C. P., da Ponte, A. N., Caiano, M., Pedroso, S. S., Pereira, R. and Fonseca, P. J.** (2013). Mate preference in the painted goby: the influence of visual and acoustic courtship signals. *J. Exp. Biol.* **216**, 3996 LP-4004.
- Barber, S. B. and Mowbray, H. M.** (1956). Mechanism of sound production in the sculpin. *Science* (80-. ). **124**, 219–220.
- Bass, A. and Baker, R.** (1991). Evolution of Homologous Vocal Control Traits. *Brain. Behav. Evol.* **38**, 240–254.
- Bass, A. H. and McKibben, J. R.** (2003). Neural mechanisms and behaviors for acoustic communication in teleost fish. *Prog. Neurobiol.* **69**, 1–26.
- Bolgan, M., Pedroso, S. S., Picciulin, M., Fonseca, P. J. and Amorim, M. C. P.** (2013). Differential investment in acoustic communication during social interactions in two closely-related sand goby species. *Behaviour* **150**, 133–152.
- Colley, O., Ovidio, M., Salmon, A. and Parmentier, E.** (2013). Contribution to the study of acoustic communication in two Belgian river bullheads (*Cottus rhenanus* and *C. perifretum*) with further insight into the sound-producing mechanism. *Front. Zool.* **10**, 71.
- Horvatić, S., Cavarro, F., Zanella, D. and Malavasi, S.** (2016). Sound production in the Ponto-



- Caspian goby *Neogobius fluviatilis* and acoustic affinities within the *Gobius* lineage: implications for phylogeny. *Biol. J. Linn. Soc.* **117**, 564–573.
- Lindström, K. and Lugli, M.** (2000). A quantitative analysis of the courtship acoustic behaviour and sound patterning in male sand goby, *Pomatoschistus minutus*. *Environ. Biol. Fishes* **58**, 411–424.
- Lugli, M. and Torricelli, P.** (1999). Prespawning sound production in mediterranean sand-gobies. *J. Fish Biol.* 691–694.
- Lugli, M., Pavan, G., Torricelli, P. and Bobbio, L.** (1995). Spawning vocalisations in male freshwater gobiids (Pisces, Gobiidae). *Environ. Biol. Fishes* **43**, 219–231.
- Lugli, M., Torricelli, P., Pavan, G. and Miller, P. J.** (1996). Breeding sounds of male *Padogobius nigricans* with suggestions for further evolutionary study of vocal behaviour in gobioid fishes. *J. Fish Biol.* **49**, 648–657.
- Lugli, M., Torricelli, P., Pavan, G. and Mainardi, D.** (1997). Sound production during courtship and spawning among freshwater gobiids (Pisces, Gobiidae). *Mar. Freshw. Behav. Physiol.* **29**, 109–126.
- Malavasi, S., Collatuzzo, S. and Torricelli, P.** (2008). Interspecific variation of acoustic signals in Mediterranean gobies (Perciformes, Gobiidae): Comparative analysis and evolutionary outlook. *Biol. J. Linn. Soc.* **93**, 763–778.
- Malavasi, S., Valerio, C. and Torricelli, P.** (2009). Courtship sounds and associated behaviours in the Canestrini's goby *Pomatoschistus canestrinii*. *J. Fish Biol.* **75**, 1883–1887.
- Parmentier, E. and Fine, M. L.** (2016). Fish sound production: insight. In *Vertebrate sound production and acoustic communication* (ed. Suthers, R.), Tecumseh, F.), Popper, A. N.), and Fay, R. R.), pp. 19–49. New York: Springer.
- Parmentier, E., Kéver, L., Boyle, K., Corbisier, Y.-E., Sawelew, L. and Malavasi, S.** (2013). Sound production mechanism in *Gobius paganellus* (Gobiidae). *J. Exp. Biol.* **216**, 3189–3199.
- Parmentier, É., Diogo, R. and Fine, M. L.** (2017). Multiple exaptations leading to fish sound production. *Fish Fish.*
- Polgar, G., Malavasi, S., Cipolato, G., Georgalas, V., Clack, J. A. and Torricelli, P.** (2011).

Acoustic communication at the water's edge: evolutionary insights from a mudskipper. *PLoS One* **6**, e21434.

**Stadler, J. M.** (2002). Evidence for a hydrodynamic mechanism of sound production by courting males of the notchtongue goby, *Bathygobius curacao* (Metzlar). *Bioacoustics* **13**, 145–152.

**Vicente, J. R., Fonseca, P. J. and Amorim, M. C. P.** (2015). Effects of temperature on sound production in the painted goby *Pomatoschistus pictus*. *J. Exp. Mar. Bio. Ecol.* **473**, 1–6.

**Whang, A. and Janssen, J.** (1994). Sound production through the substrate during reproduction in the mottled sculpin, *Cottus bairdi* (Cottidae). *Environ. Biol. Fishes* **40**, 141–148.

**Zeyl, J. N., Malavasi, S., Holt, D. E., Noel, P., Lugli, M. and Johnston, C. E.** (2016). Convergent aspects of acoustic communication in darters, sculpins and gobies. In *Fish Hearing and Bioacoustics: An Anthology in Honor of Arthur N. Popper and Richard R. Fay* (ed. Sisneros, A. J.), pp. 93–120. Cham: Springer International Publishing.

## Figures

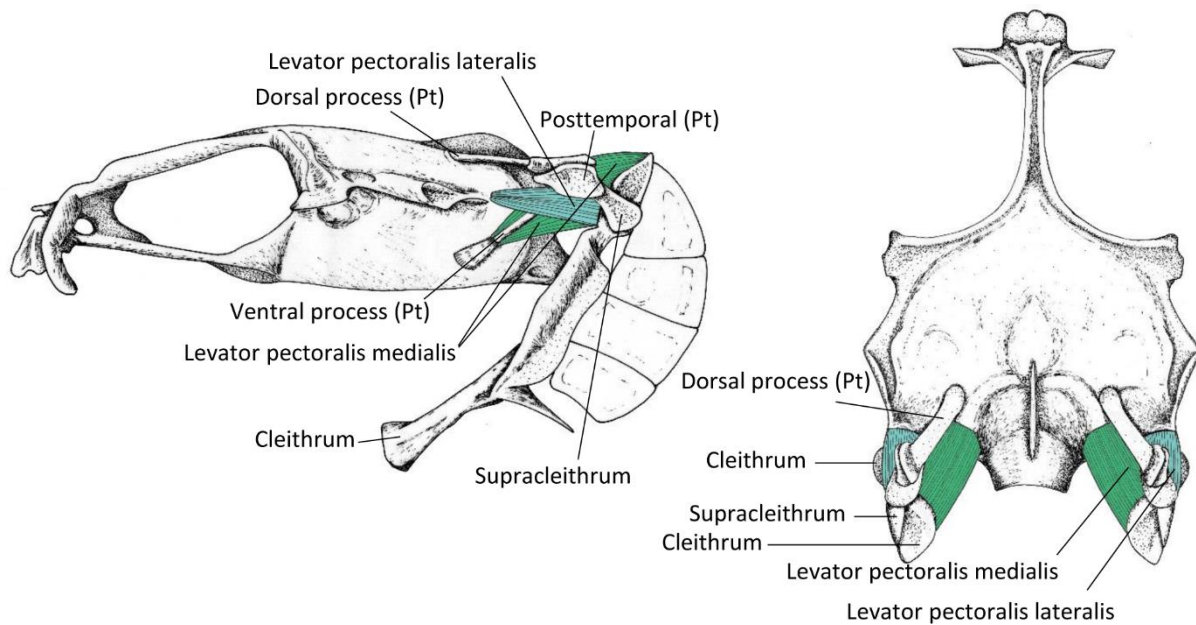

**Figure 1.** (A) Left lateral view of the neurocranium, pectoral girdle and sonic muscles in *P. pictus*. (B) Dorsal view of the neurocranium and pectoral girdle (left) and with sonic muscles indicated (right). Pt, post-temporal.

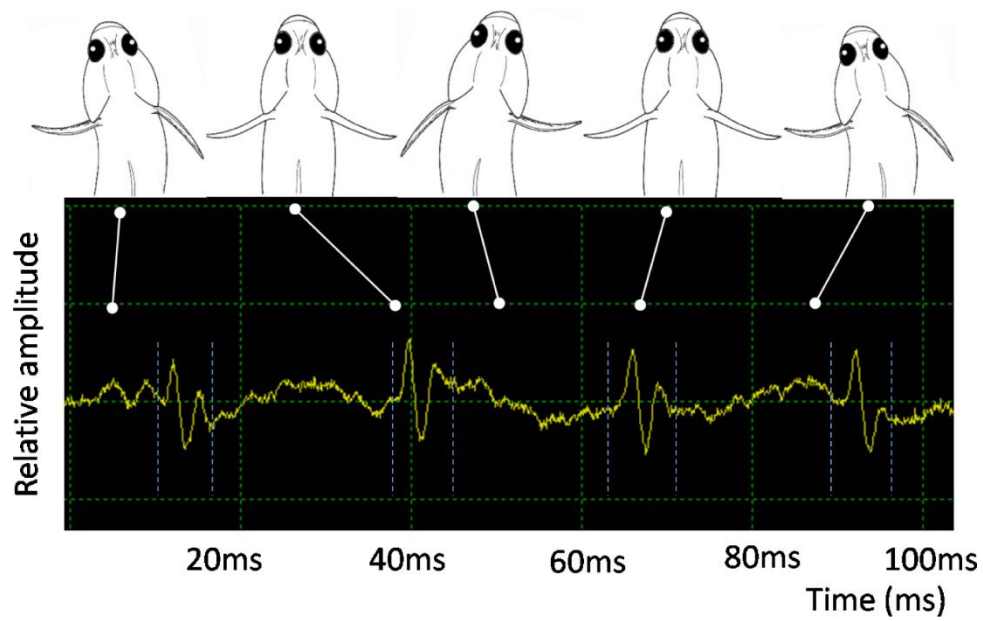

**Figure 2.** Oscillogram of drumming sound in relation with a dorsal view of associated movements of the head and opposed motions of pectoral fins in *P. pictus*. The white lines identify the movement of the fish and the corresponding position on the oscillogram. Pulses are delimited by the blue dotted lines.
